# Supplementary material for: Single nucleotide variants of succinate dehydrogenase A gene in renal cell carcinoma
Source: PubMed Central journal article supplement — Cancer Sci. 2021 Jun 17;112(8):3375–87. doi: 10.1111/cas.14977 (PMC8353944; doi:10.1111/cas.14977), 2021-06-17
Supplement: CAS-112-3375-s001.pdf [file CAS-112-3375-s001.pdf]

Supplementary Table 2. The blood/tumour sequence traces for the SDHA variants to allow assessment for LOH.

**Tissue**

| contig_id | contig_srt | contig_end | region_id | attributes | go_count | overlaps | fwd_e2e | rev_e2e | total_read | fwd_read | rev_read |
|-----------|------------|------------|-----------|------------|----------|----------|---------|---------|------------|----------|----------|
| chr5      | 228171     | 228320     | AMPL715   | GENE_ID    | 59       | 6646     | 73      | 59      | 165        | 89       | 76       |
| chr5      | 254500     | 254718     | AMPL715   | GENE_ID    | 135      | 3206     | 1360    | 1438    | 3206       | 1622     | 1584     |
| chr5      | 224582     | 224757     | AMPL715   | GENE_ID    | 107      | 22581    | 28      | 2015    | 6511       | 4334     | 2177     |
| chr5      | 228310     | 228516     | AMPL715   | GENE_ID    | 82       | 7185     | 1704    | 4023    | 7036       | 2367     | 4669     |
| chr5      | 223518     | 223732     | AMPL715   | GENE_ID    | 94       | 8900     | 2523    | 4085    | 8900       | 3959     | 4941     |
| chr5      | 233558     | 233769     | AMPL715   | GENE_ID    | 105      | 11242    | 4807    | 2907    | 11242      | 54122    | 5830     |
| chr5      | 240532     | 240687     | AMPL715   | GENE_ID    | 76       | 26187    | 4759    | 4275    | 11285      | 61151    | 5134     |
| chr5      | 225914     | 226133     | AMPL715   | GENE_ID    | 98       | 31342    | 2773    | 2121    | 11368      | 6059     | 5309     |
| chr5      | 230941     | 231166     | AMPL715   | GENE_ID    | 135      | 11551    | 2114    | 5149    | 11551      | 5383     | 6168     |
| chr5      | 251067     | 251289     | AMPL715   | GENE_ID    | 113      | 11580    | 6134    | 4293    | 11580      | 6585     | 4995     |
| chr5      | 236522     | 236726     | AMPL715   | GENE_ID    | 121      | 12992    | 6166    | 3596    | 12992      | 6551     | 6441     |
| chr5      | 251350     | 251571     | AMPL715   | GENE_ID    | 139      | 27813    | 4746    | 6714    | 13410      | 5456     | 7954     |
| chr5      | 235238     | 235429     | AMPL715   | GENE_ID    | 114      | 30220    | 6314    | 5881    | 13417      | 6961     | 6456     |
| chr5      | 251449     | 251651     | AMPL715   | GENE_ID    | 129      | 27701    | 7359    | 4631    | 14445      | 9132     | 5313     |
| chr5      | 256397     | 256587     | AMPL715   | GENE_ID    | 82       | 14778    | 7828    | 5606    | 14778      | 8155     | 6623     |
| chr5      | 240371     | 240542     | AMPL715   | GENE_ID    | 60       | 26689    | 7249    | 1320    | 16259      | 8615     | 7644     |
| chr5      | 225502     | 225709     | AMPL715   | GENE_ID    | 127      | 16430    | 5260    | 9352    | 16430      | 5535     | 10895    |
| chr5      | 224389     | 224592     | AMPL715   | GENE_ID    | 93       | 23371    | 7501    | 4077    | 17001      | 8495     | 8506     |
| chr5      | 235426     | 235548     | AMPL715   | GENE_ID    | 71       | 30229    | 5585    | 10948   | 17462      | 5820     | 11642    |
| chr5      | 226089     | 226243     | AMPL715   | GENE_ID    | 96       | 29423    | 8955    | 10522   | 20910      | 9258     | 11652    |

**Blood**

| contig_id | contig_srt | contig_end | region_id | attributes | go_count | overlaps | fwd_e2e | rev_e2e | total_read | fwd_read | rev_read |
|-----------|------------|------------|-----------|------------|----------|----------|---------|---------|------------|----------|----------|
| chr5      | 228171     | 228320     | AMPL715   | GENE_ID    | 59       | 2978     | 30      | 46      | 124        | 53       | 71       |
| chr5      | 254500     | 254718     | AMPL715   | GENE_ID    | 135      | 2975     | 1329    | 1316    | 2975       | 1529     | 1446     |
| chr5      | 228310     | 228516     | AMPL715   | GENE_ID    | 82       | 3276     | 774     | 1600    | 3176       | 1213     | 1963     |
| chr5      | 224582     | 224757     | AMPL715   | GENE_ID    | 107      | 14245    | 36      | 1391    | 5097       | 3595     | 1502     |
| chr5      | 251067     | 251289     | AMPL715   | GENE_ID    | 113      | 5284     | 2794    | 2050    | 5284       | 2954     | 2330     |
| chr5      | 233558     | 233769     | AMPL715   | GENE_ID    | 105      | 5296     | 2382    | 1661    | 5286       | 2599     | 2697     |
| chr5      | 251449     | 251651     | AMPL715   | GENE_ID    | 129      | 16645    | 2780    | 2035    | 5714       | 3270     | 2444     |
| chr5      | 226089     | 226243     | AMPL715   | GENE_ID    | 96       | 14289    | 3576    | 2672    | 6774       | 3702     | 3072     |
| chr5      | 225502     | 225709     | AMPL715   | GENE_ID    | 127      | 6945     | 1910    | 4426    | 6945       | 1990     | 4955     |
| chr5      | 223518     | 223732     | AMPL715   | GENE_ID    | 94       | 7175     | 2176    | 3037    | 7175       | 3255     | 3920     |
| chr5      | 235426     | 235548     | AMPL715   | GENE_ID    | 71       | 20252    | 2538    | 5163    | 8195       | 2712     | 5483     |
| chr5      | 256397     | 256587     | AMPL715   | GENE_ID    | 82       | 8628     | 4270    | 3415    | 8628       | 4485     | 4143     |
| chr5      | 224389     | 234592     | AMPL715   | GENE_ID    | 93       | 14430    | 4304    | 811     | 9425       | 4640     | 4785     |
| chr5      | 230941     | 231166     | AMPL715   | GENE_ID    | 135      | 9907     | 1869    | 4921    | 9907       | 4400     | 5507     |
| chr5      | 240532     | 240687     | AMPL715   | GENE_ID    | 76       | 19864    | 4530    | 3348    | 10408      | 6018     | 4390     |
| chr5      | 240371     | 240542     | AMPL715   | GENE_ID    | 60       | 20106    | 4929    | 371     | 10742      | 6300     | 4442     |
| chr5      | 225914     | 226133     | AMPL715   | GENE_ID    | 98       | 17384    | 1982    | 1823    | 10875      | 5897     | 4978     |
| chr5      | 251350     | 251571     | AMPL715   | GENE_ID    | 139      | 16850    | 3467    | 6470    | 11163      | 3873     | 7290     |
| chr5      | 235238     | 235429     | AMPL715   | GENE_ID    | 114      | 20508    | 6321    | 5324    | 12619      | 6960     | 5659     |
| chr5      | 236522     | 236726     | AMPL715   | GENE_ID    | 121      | 14121    | 6927    | 3651    | 14121      | 7428     | 6693     |

SDHA region coverage (depth) of Tissue is min 3206x to max 31342x, mean 19000x. SDHA region coverage of Blood is min 2975x to max 20252x, mean 12057x. For the accuracy assessment variants, we think both, Blood & Tissue, of coverage (19000x, 12057x) is enough to show sufficient accuracy.
