# Supplementary material for: Single nucleotide variants of succinate dehydrogenase A gene in renal cell carcinoma
Source: PubMed Central journal article supplement — Cancer Sci. 2021 Jun 17;112(8):3375–87. doi: 10.1111/cas.14977 (PMC8353944; doi:10.1111/cas.14977), 2021-06-17
Supplement: CAS-112-3375-s002.pdf [file CAS-112-3375-s002.pdf]

Supplementary Table 3. Database regarding SDHA gene mutation

| Source   | c.1969G>A                     | c.163T>C                                              | c.550G>A                |
|----------|-------------------------------|-------------------------------------------------------|-------------------------|
| COSMIC * | Diffuse large B cell lymphoma | Acute myeloid leukaemia                               | Acute myeloid leukaemia |
|          | Pheochromocytoma              |                                                       |                         |
|          | Adenocarcinoma                |                                                       |                         |
|          | Haemangioblastoma             |                                                       |                         |
| ClinVar* |                               | Benign/Likely benign                                  |                         |
| OMIM*    |                               | Leigh syndrome                                        |                         |
|          |                               | Mitochondrial respiratory chain complex II deficiency |                         |
|          |                               | Cardiomyopathy                                        |                         |
|          |                               | Paraganglioma                                         |                         |

COSMIC \* : Catalogue of Somatic Mutations in Cancer, <https://cancer.sanger.ac.uk/cosmic>

ClinVar\* : <https://www.ncbi.nlm.nih.gov/clinvar/>

OMIM\* : <https://www.ncbi.nlm.nih.gov/omim>
