# Supplementary material for: Single nucleotide variants of succinate dehydrogenase A gene in renal cell carcinoma
Source: PubMed Central journal article supplement — Cancer Sci. 2021 Jun 17;112(8):3375–87. doi: 10.1111/cas.14977 (PMC8353944; doi:10.1111/cas.14977), 2021-06-17
Supplement: CAS-112-3375-s005.pdf [file CAS-112-3375-s005.pdf]

Supplementary Table.1: Primers for direct Sanger sequencing

|        | Forward                  | Reverse                    |
|--------|--------------------------|----------------------------|
| SDHA   |                          |                            |
| exon1  | gccccgctcgactcc          | tctactaaggaccgagctccccg    |
| exon2  | acagtttgcaaggggaaa       | cataacagatacaagtaaaaatgta  |
| exon3  | agggtcggaatgtgccacc      | ggccatgtggctggagcagg       |
| exon4  | gcctggaagacaaagttggc     | catataatgcatagttcataacggaa |
| exon5  | tcttttccggtatgaactatgc   | cgctgcatgcgccccacgct       |
| exon6  | ctgccttgtctgtactgctc     | caaggcctgtgtctaaaccgt      |
| exon7  | tgccattctgtgatctcacc     | agttaggacctgagagctga       |
| exon8  | gccttctgcttatcttttctctt  | taagagaggtggctgtgcacatgc   |
| exon9  | cacactccaagatgacgtat     | tgcgaggtgggccccgctc        |
| exon10 | tttagtagagatgggggttcaccg | gactctgaaggtgaggtgttgaa    |
| exon11 | tgagtggctgtgctacatgtttg  | ggccaggtatgcagccct         |
| exon12 | tcctaattttctgtttaattatg  | ggttgtggctttatagctgt       |
| exon13 | gggtcctggcccacagcta      | acttttggggcaacgaaag        |
| exon14 | gctctgttagagtaataagaaac  | gaagcccgactgctgtcg         |
| exon15 | gaatcttaaagttcacatgcca   | ggcaagctcccagccacta        |

|       | Forward                | Reverse                   |
|-------|------------------------|---------------------------|
| SDHB  |                        |                           |
| exon1 | tacgcggctagtgggtcct    | aactcacaagctgctgcgag      |
| exon2 | tggatattgaatgcctgcctt  | aaggatgtgaaaagcatgtccc    |
| exon3 | ctgagaagaccaaagtgataag | cagcaagttcaccagcagag      |
| exon4 | gcaggactgattccggatatg  | gtggtcctcctcctgccaat      |
| exon5 | ggcttctgcctggcatagag   | gttcctgccaagccacact       |
| exon6 | ggcactttgtcatgcactga   | caatgaaggaaaccaggccc      |
| exon7 | tgagttgagccaggggtcc    | gcccctaggctcacactgaaa     |
| exon8 | caaccctatggtttgagggga  | tgctgtattcatggaaaaccaagat |

|       | Forward                | Reverse              |
|-------|------------------------|----------------------|
| VHL   |                        |                      |
| exon1 | cgaagactacggaggaggtcga | ggtagaggggcttcagac   |
| exon2 | agggtgtggccaccgtg      | ttcaaggtgtctatcctgac |
| exon3 | ttcctgtactgagaccctagt  | catcagtaccatcaaaagct |
